# Supplementary material for: Development and usability testing of mobile application on diet and oral health
Source: PubMed Central journal article supplement (PMC8425540; doi:10.1371/journal.pone.0257035), 2021-09-08
Supplement: pone.0257035.s001.pdf [file pone.0257035.s001.pdf]

**S1 Table. List of Notification and Reminder Messages**

| No. | Notification Messages                                                                                                                                                                               |
|-----|-----------------------------------------------------------------------------------------------------------------------------------------------------------------------------------------------------|
| 1.  | Gula yang terdapat dalam susu, jus buah-buahan atau minuman bergula yang lain akan bertindak balas dengan bakteria dalam mulut boleh menghasilkan asid yang menyebabkan kerosakan gigi.             |
| 2.  | Tanda-tanda awal kejadian karies yang dapat dilihat di dalam mulut adalah tompok atau garisan putih ( <i>white spot lesions</i> ) pada permukaan gigi yang tersembunyi di bawah plak.               |
| 3.  | Apabila kanak-kanak sudah boleh mula meludah, penggunaan ubat gigi berfluorida boleh digunakan.                                                                                                     |
| 4.  | Amalkan pemakanan yang seimbang, lebihkan buah-buahan dan sayur-sayuran segar dalam diet harian anak anda.                                                                                          |
| 5.  | Kenyataan yang mengatakan epal adalah pembersih gigi adalah salah kerana dengan memakan epal, tidak boleh membersihkan plak yang ada di gigi.                                                       |
| 6.  | Kurangkan pengambilan gula dalam semua makanan dan minuman. Minuman berperisa buah-buahan (contoh: laici, anggur, oren dan lain-lain) adalah tidak selamat untuk gigi anak anda.                    |
| 7.  | Elakkan pengambilan makanan bergula di antara waktu makan utama. Sekiranya tidak dapat dielakkan, pilih makanan kariostatik yang tidak merbahaya seperti buah-buahan segar, kacang, susu, dan keju. |
| 8.  | Elakkan mengambil minuman bergas/berkarbonat dan isotonik terlalu kerap kerana ia mempunyai kandungan gula yang tinggi.                                                                             |
| 9.  | Berus gigi anak anda sekurang-kurangnya 2 kali sehari. Galakkan juga anak-anak anda berkumur selepas makan untuk mengeluarkan sisa makanan/minuman bergula.                                         |
| 10. | Elakkan menambah gula ke dalam susu formula anak anda. Elakkan memberi susu formula yang mengandungi gula tambahan kepada anak anda.                                                                |
| 11. | Jangan biarkan bayi atau kanak-kanak tidur dengan botol yang mengandungi susu, jus buah-buahan atau minuman bergula lain kerana ia boleh merosakkan gigi.                                           |
| 12. | Penggunaan botol susu sebaiknya dihentikan setelah anak berumur 1 tahun.                                                                                                                            |
| 13. | Hadkan makanan/minuman bergula pada waktu makan utama iaitu sarapan, makan tengahari dan malam sahaja.                                                                                              |
| 14. | Elakkan memberi gula-gula, manisan, biskut dan ais krim sebagai hadiah atau ganjaran kepada kanak-kanak.                                                                                            |

| No. | Notification Messages                                                                                                                                                                       |
|-----|---------------------------------------------------------------------------------------------------------------------------------------------------------------------------------------------|
| 15. | Lawatan pertama ke klinik untuk pemeriksaan perlu dilakukan dalam tempoh 6 bulan selepas gigi pertama tumbuh atau sebelum umur bayi mencecah 1 tahun.                                       |
| 16. | Kebanyakan ubat dalam bentuk cecair dan vitamin kanak-kanak mempunyai kandungan gula yang tinggi. Kumur setelah mengambil ubat-ubatan tersebut.                                             |
| 17. | Pemeriksaan gigi perlu dilakukan secara berkala sekurang-kurangnya sekali setahun. Pemeriksaan atau lawatan yang lebih kerap akan disyorkan jika perlu.                                     |
| 18. | Beri makanan yang mencukupi mengikut piramid makanan bagi keperluan tenaga anak anda.                                                                                                       |
| 19. | Semak kandungan gula pada senarai ramuan sesuatu produk makanan. Sekiranya gula tersenarai di bahagian awal senarai ramuan, ini menunjukkan gula merupakan komponen utama makanan tersebut. |
| 20. | Beri pelbagai jenis makanan bagi memastikan keperluan nutrien kanak-kanak dipenuhi.                                                                                                         |
| 21. | Jangan beri minuman manis dalam botol susu.                                                                                                                                                 |
| 22. | Satu tin minuman bergas (12 oz) mengandungi 10 sudu teh gula dan ia boleh merosakkan gigi anak anda                                                                                         |
| 23. | Pilih makanan yang rendah gula. Makanan jenis ini biasanya dilabel sebagai kurang gula ( <i>less sugar</i> ) atau bebas gula ( <i>sugar-free</i> ).                                         |
| 24. | Galakkan penggunaan cawan seawal usia 6 bulan dan gunakan cawan sepenuhnya untuk menggantikan botol susu apabila anak telah mencapai usia 12 bulan.                                         |
| 25. | Ubat gigi berfluorida baik untuk anak anda kerana ia boleh mencegah gigi berlubang.                                                                                                         |
| 26. | Selia dan bantu anak anda memberus gigi sehingga mereka berusia enam hingga lapan tahun.                                                                                                    |
| 27. | Pilih berus gigi yang sesuai, bersaiz kecil dan lembut dan mempunyai pemegang yang selesa untuk anak anda.                                                                                  |
| 28. | Flourida melindungi gigi dengan membuat enamel lebih berdaya tahan daripada serangan asid.                                                                                                  |
| 29. | Pantau kesihatan gigi anak anda secara berkala.                                                                                                                                             |
| 30. | Pilihlah jenis makanan dan kuantiti yang betul mengikut saranan pinggan Suku-Suku-Separuh dengan penyediaan yang menarik untuk menjamin pertumbuhan yang optimum untuk anak anda.           |

| <b>No.</b> | <b>Notification Messages</b>                                                                                                                              |
|------------|-----------------------------------------------------------------------------------------------------------------------------------------------------------|
| 31.        | Kurangkan kekerapan pengambilan gula. Sekiranya anak anda mempunyai gula-gula yang banyak, adalah baik untuk dimakan semuanya sekaligus.                  |
| 32.        | Karies di peringkat awal kanak-kanak dapat dicegah melalui penjagaan kebersihan mulut dan mengelakkan makanan bergula.                                    |
| 33.        | Elakkan mengambil makanan yang manis dan melekit.                                                                                                         |
| 34.        | Bersihkan gigi anak anda sebaik sahaja gigi tumbuh.                                                                                                       |
| 35.        | Elakkan mengambil makanan manis secara berterusan iaitu dalam jangkamasa kurang dari 20 minit.                                                            |
| 36.        | Berilah anak anda diet harian yang seimbang dan berkhasiat iaitu dengan pengambilan makanan dengan mengikuti saranan yang terdapat dalam piramid makanan. |
| 37.        | Gunakan hanya secalit ubat gigi sahaja untuk kanak-kanak berumur di bawah 3 tahun.                                                                        |
| 38.        | Pastikan anak anda tidak menelan ubat gigi semasa memberus gigi.                                                                                          |
| 39.        | Elakkan mencelup puting susu dengan gula atau manisan.                                                                                                    |
| 40.        | Gunakan ubat gigi sebesar kacang pis (5mm) sahaja untuk kanak-kanak yang berumur 3 tahun ke atas.                                                         |
| 41.        | Gunakan susu segar atau susu rendah lemak bagi menggantikan susu pekat manis.                                                                             |
| 42.        | Sentiasa memerhatikan anak anda semasa memberi susu di dalam botol dengan mengikut masa yang telah ditetapkan                                             |
| 43.        | Gigi kanak-kanak perlu dibersihkan sekurang-kurangnya 2 kali sehari, iaitu pada waktu pagi dan pada waktu malam sebelum tidur.                            |
| 44.        | Keluarkan botol susu dari mulut sebaik sahaja habis menyusu botol.                                                                                        |
| 45.        | Sebelum tumbuhnya gigi susu, bersihkan gusi anak-anak menggunakan tuala atau kain bersih yang dibasahkan dan dibalut pada jari.                           |
| <b>No.</b> | <b>Reminder Messages</b>                                                                                                                                  |
| 1.         | Anda belum log masuk ke aplikasi “Gigiku Sihat” untuk minggu ini. Anda ingin melakukannya sekarang? Klik di sini                                          |
| 2.         | Salam Sejahtera! Dah lama tak jumpa tuan/puan di aplikasi Gigiku Sihat. Jom log masuk di sini.                                                            |
